## RESEARCH ARTICLE

# The impact of cell size on morphogen gradient precision

Jan A. Adelman<sup>1,2</sup>, Roman Vetter<sup>1,2</sup> and Dagmar Iber<sup>1,2,\*</sup>

## ABSTRACT

Tissue patterning during embryonic development is remarkably precise. Here, we numerically determine the impact of the cell diameter, gradient length and the morphogen source on the variability of morphogen gradients. We show that the positional error increases with the gradient length relative to the size of the morphogen source, and with the square root of the cell diameter and the readout position. We provide theoretical explanations for these relationships, and show that they enable high patterning precision over developmental time for readouts that scale with expanding tissue domains, as observed in the *Drosophila* wing disc. Our analysis suggests that epithelial tissues generally achieve higher patterning precision with small cross-sectional cell areas. An extensive survey of measured apical cell areas shows that they are indeed small in developing tissues that are patterned by morphogen gradients. Enhanced precision may thus have led to the emergence of pseudostratification in epithelia, a phenomenon for which the evolutionary benefit had so far remained elusive.

**KEY WORDS:** Morphogen gradient, Patterning, Precision, Development, Cell size

## INTRODUCTION

During embryogenesis, cells must coordinate complex differentiation programs within expanding tissues. According to the French flag model (Wolpert, 1969), morphogen gradients define pattern boundaries in the developing tissue based on concentration thresholds. Exponential functions of the form

$$C(x) = C_0 e^{-x/\lambda} \quad (1)$$

approximate the shape of measured morphogen gradients very well (Kicheva et al., 2007; Gregor et al., 2007; 2008; Yu et al., 2009; Wartlick et al., 2011; 2014; Cohen et al., 2015; Mateus et al., 2020). For such gradients, the mean readout position

$$\mu_x = \text{mean} [x_\theta]$$

and the positional error

$$\sigma_x = \text{stddev} [x_\theta]$$

<sup>1</sup>Department of Biosystems Science and Engineering, ETH Zürich, Mattenstrasse 26, 4058 Basel, Switzerland. <sup>2</sup>Swiss Institute of Bioinformatics, Mattenstrasse 26, 4058 Basel, Switzerland.

\*Author for correspondence (dagmar.iber@bsse.ethz.ch)

 J.A.A., 0000-0003-0876-3363; R.V., 0000-0003-2901-7036; D.I., 0000-0001-8051-1035

This is an Open Access article distributed under the terms of the Creative Commons Attribution License (<https://creativecommons.org/licenses/by/4.0>), which permits unrestricted use, distribution and reproduction in any medium provided that the original work is properly attributed.

Handling Editor: Paul François

Received 13 February 2023; Accepted 2 May 2023

of the domain boundary positions

$$x_\theta = \lambda \ln \frac{C_0}{C_\theta}$$

in different embryos depend on the variation in the decay length  $\lambda$  and in the amplitude  $C_0$  relative to the concentration threshold  $C_\theta$ . Strikingly, the positional error of measured morphogen gradients has been reported to exceed that of their readouts (Houchmandzadeh et al., 2002; Gregor et al., 2007; Zagorski et al., 2017). Several theories have been proposed to explain the high readout precision, despite inevitable noise and variation in morphogen gradients and their readout processes. They include temporal and spatial averaging, self-enhanced morphogen turnover, the use of opposing gradients, dynamic readouts, and cell-cell signalling (Houchmandzadeh et al., 2002; Gregor et al., 2007; Lander et al., 2009; Morishita and Iwasa, 2009, 2011; Tkačik et al., 2015; Zagorski et al., 2017; Erdmann et al., 2009; Sokolowski and Tkačik, 2015; Ellison et al., 2016; Mugler et al., 2016; Reyes et al., 2022 preprint). In zebrafish, in which cells are rather motile, cell sorting and competition can further enhance boundary precision (Xiong et al., 2013; Akieda et al., 2019; Tsai et al., 2020). Here, we have studied patterning precision conveyed by morphogen gradients in epithelia but leave the effect of precision-enhancing processes in the morphogen readout for future work.

A recently developed numerical framework estimates how much variability in and between morphogen gradients can be accounted for by cell-to-cell variability reported for morphogen production, decay and diffusion (Vetter and Iber, 2022). In this article, we extend the model to take a different perspective on the precision of gradient-based patterning in cellular tissues. We analyse the impact of various length scales present in the epithelium, such as the cell diameter and source size, as well as spatial averaging, on morphogen gradient variability. The findings suggest that positional accuracy is higher, the narrower the cells and the larger the morphogen source.

We approximate the patterning axis by a discrete line consisting of two subdomains, a source domain on the interval  $-L_s \leq x \leq 0$  and a patterning domain on the interval  $0 \leq x \leq L_p$ , each divided into sub-intervals  $i$  representing individual epithelial cells with diameter  $\delta_i$  in 1D, or cross-sectional areas  $A_i$  in 2D (Fig. 1A). Noisy exponential gradients were generated by numerically solving the one-dimensional steady-state reaction-diffusion boundary value problem (Vetter and Iber, 2022)

$$p_i H(-x) - d_i C(x) = -D_i \frac{\partial^2 C(x)}{\partial x^2} \quad (2)$$

with zero-flux boundary conditions

$$\left. \frac{\partial C}{\partial x} \right|_{x=-L_s, L_p} = 0.$$

Eqn 2 contains a source with production rates  $p_i$  and a linear sink with degradation rates  $d_i$ , and models morphogen transport by Fickian diffusion with effective coefficients  $D_i$ ; subscripts  $i$  indicate

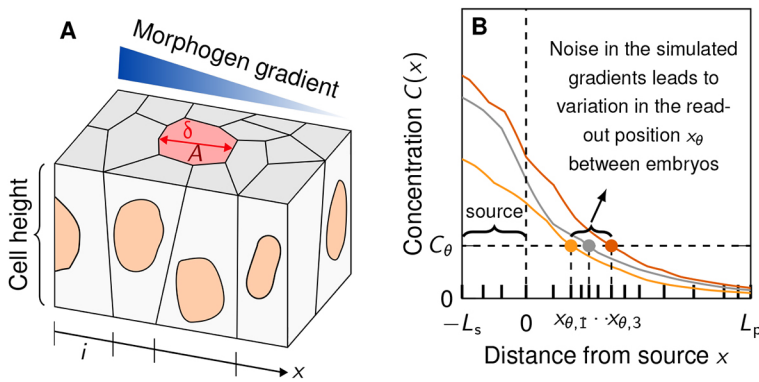

**Fig. 1. Patterning in epithelial tissues with variability in the morphogen kinetics and cell size.** (A) Schematic of an epithelial layer of cells (index  $i$ ) with cross-sectional area  $A$  and diameter  $\delta$  along the patterning axis  $x$ . (B) Schematic of positional variability resulting from the readout of noisy gradients in a cellular domain, split into a morphogen-secreting source of length  $L_s$  and a patterning domain of length  $L_p$ .

that they vary from cell to cell. The Heaviside step function  $H(-x)$  ensures that morphogen production occurs only in the source, whereas degradation is assumed to take place over the whole domain. The kinetic parameters  $k=p$ ,  $d$ ,  $D$  were drawn for each cell independently from log-normal distributions. This assumes statistical independence of neighbouring cells; we will later relax this assumption by introducing spatial correlation. The distributions had prescribed mean values  $\mu_k$  and respective coefficients of variation  $CV_k = \sigma_k / \mu_k$ , analogous to Vetter and Iber (2022). We fixed molecular variability at the physiological value  $CV_k = 0.3$  (Vetter and Iber, 2022).

As a new source of noise, we introduced cell size variability. As the cell area distributions in the *Drosophila* larval and prepupal wing discs, and in the mouse neural tube resemble log-normal distributions (Sánchez-Gutiérrez et al., 2016; Guerrero et al., 2019), we drew individual cell areas  $A_i$  independently of a log-normal distribution with a prescribed mean  $\mu_A$  and a coefficient of variation  $CV_A$ . This allowed us to evaluate the impact of cell-to-cell variability in the production, degradation and diffusion rates  $p_i$ ,  $d_i$  and  $D_i$ , as well as in the cell cross-sectional areas  $A_i$ , on gradient variability (Fig. 1B).

## RESULTS

### Gradient variability increases with cell size, but not with physiological levels of cell area variability

We quantify relative variability or uncertainty of a positive quantity  $X$  by its coefficient of variation  $CV_X = \sigma_X / \mu_X$ , where  $\mu_X$  and  $\sigma_X$  indicate the mean and standard deviation of  $X$ , respectively. For the local morphogen concentration, this is  $CV_C$ . Alternatively, one can fit Eqn 1 to each generated morphogen gradient (see supplementary Materials and Methods) and quantify  $CV_\lambda$  and  $CV_0$  of the two free parameters  $\lambda$  and  $C_0$  individually. We performed simulations covering a wide range of cell sizes, potentially larger than is relevant for a specific type of tissue or organism, to reveal the functional dependency of gradient variability on the cell diameter with statistical confidence. An increase in the average cell diameter  $\mu_\delta$  leads to greater variability in  $\lambda$  and  $C_0$  (Fig. 2A,B), according to power laws

$$CV_\lambda \sim \mu_\delta^\alpha \text{ and } CV_0 \sim \mu_\delta^\beta \quad (3)$$

with exponents  $\alpha = 0.510 \pm 0.004$  (SE, Fig. 2A, blue curve) and  $\beta = 0.472 \pm 0.005$  (Fig. 2B, blue curve). The amplitude variability  $CV_0$  plateaus when  $\mu_\delta \geq L_s$ , because the source defaults back to a single cell in this case. Square-root scaling for the decay length variability ( $\alpha = 1/2$ ) follows theoretically from the law of large numbers and is consistent with the inverse-square-root scaling reported for the dependency of  $CV_\lambda$  on the patterning domain length

$L_p$  at fixed cell size (Vetter and Iber, 2022). Together, this suggests that

$$CV_\lambda \sim \sqrt{\frac{\mu_\delta}{L_p}} \sim \sqrt{\frac{1}{N_{\text{cells}}}} \quad (4)$$

where  $N_{\text{cells}}$  is the (mean) number of cells along the patterning axis. Similarly, morphogen sources composed of more and smaller cells buffer cell-to-cell variability in morphogen kinetics more effectively, leading to the observed reduction in amplitude variability  $CV_0$ . Smaller cell diameters thus lead to smaller effective morphogen gradient variability.

Cell-to-cell variability in the cross-sectional cell area  $A$  does not affect the gradient variability as long as  $CV_A < 1$  (Fig. 2C,D). Only for extreme cell area variability exceeding 1 does the variability in  $\lambda$  grow (Fig. 2C). However, we are not aware of any reported  $CV_A > 1$  (Guerrero et al., 2019; Kokic et al., 2019 preprint; Gómez et al., 2021; Bocanegra-Moreno et al., 2023). Consequently, cell size has a considerable impact on gradient variability, while physiological levels of variability in the cell area do not contribute to gradient imprecision. A larger source or gradient length reduces only the amplitude variability, but does not affect the decay length variability (Fig. 2E-H). Amplitude and gradient decay length variability is reduced in a source that is composed of many cells with a small mean diameter (see supplementary Materials and Methods for further details, Fig. S5). The parameter values in all reported simulations correspond to those reported for the mouse neural tube ( $\mu_\lambda = 20 \mu\text{m}$ ,  $\mu_\delta = 5 \mu\text{m}$ ,  $L_s = 5\mu_\delta$  and  $L_p = 50\mu_\delta$ ), unless stated otherwise. At these values, source sizes above  $25 \mu\text{m}$  and gradient decay lengths above  $20 \mu\text{m}$  barely reduce amplitude variability. Sonic hedgehog (SHH) in the neural tube is secreted from both the notochord and the floor plate, while bone morphogenetic protein (BMP) is secreted from both the ectoderm and the roof plate. Intriguingly, while the SHH-secreting notochord shrinks over time, it still measures about  $30 \mu\text{m}$  in width by the 5-somite stage (Imuta et al., 2014), and the SHH-secreting floor plate then emerges in the ventral part of the neural tube and widens over time (Kicheva et al., 2014). The gradient length remains constant at about  $\mu_\lambda = 20 \mu\text{m}$  (Cohen et al., 2015; Zagorski et al., 2017), the largest value for which the positional error remains small at a large distance ( $12\mu_\lambda = 240 \mu\text{m}$ ) from the source. The source size thus assumes the smallest value and the gradient decay length the largest value for which morphogen gradient variability remains small.

### Readout position is barely shifted by spatial averaging

As cells can assume only a single fate, domain boundaries must follow cell boundaries (Fig. 3A). We sought to quantify the impact on the readout position if epithelial cells average the signal over

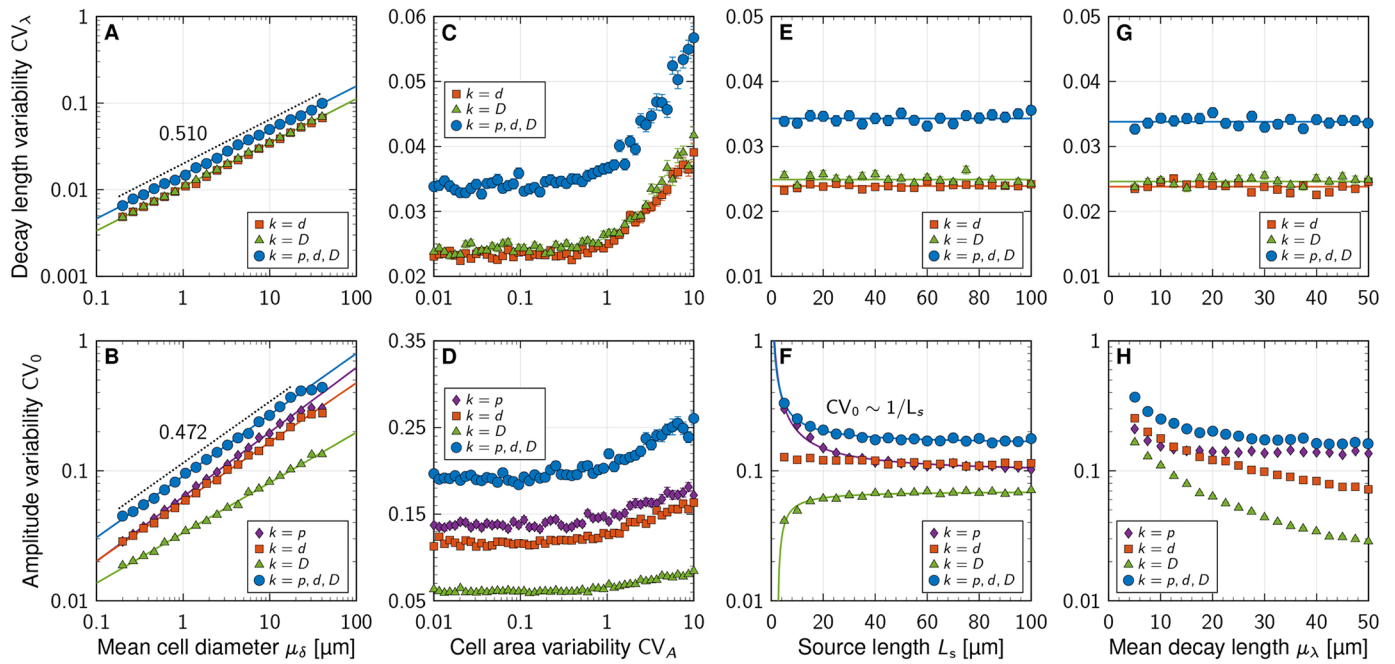

**Fig. 2. Impact of cell size, source length and gradient length on morphogen gradient variability.** (A,B) Scaling of gradient variability with the cell diameter at fixed kinetic variability  $CV_{p,d,D}$  and fixed cell area variability  $CV_A$ . Fitted power-law exponents are indicated, and correspond to fits to the blue data points. (C,D) Effect of cell area variability on gradient variability. (E,F) Effect of source length on gradient decay length and amplitude variability. (G,H) Impact of mean gradient decay length on decay length and amplitude variability. Data are mean $\pm$ s.e.m. of  $n=10^3$  independent simulations, with kinetic variability only in the parameters indicated by different symbols: purple,  $CV_p=0.3$ ,  $CV_{d,D}=0$ ; red,  $CV_d=0.3$ ,  $CV_{p,D}=0$ ; green,  $CV_p=0.3$ ,  $CV_{p,d}=0$ ; blue,  $CV_{p,d,D}=0.3$ . Cell area variability:  $CV_A=0.5$ , except in C,D. Domain sizes:  $L_s=25 \mu\text{m}$ , except in E,F;  $L_p=250 \mu\text{m}$ , except in F,G. The effect of  $CV_p$  on  $CV_\lambda$  is minuscule,  $\mathcal{O}(10^{-8})$ , and therefore not plotted in the top row. See supplementary Materials and Methods for further details and Table S1 for fit parameters.

their entire apical cell surface. Assuming that cells have no orientational bias, we can approximate cell surfaces as disks with radius  $r=\mu_\delta/2$  about a centre point  $x_0$ . If threshold-based readout operates on the averaged concentration, the effective readout domain boundary is shifted along the exponential concentration gradient to  $x_0=x_\theta+\Delta x$  by the distance

$$\Delta x = \lambda \ln \left[ \frac{\sum_{k=0}^{\infty} \frac{(r/2\lambda)^{2k}}{k!(k+1)!} \right] = \lambda \left[ \frac{1}{8} \left( \frac{r}{\lambda} \right)^2 - \frac{1}{384} \left( \frac{r}{\lambda} \right)^4 + \mathcal{O} \left( \left( \frac{r}{\lambda} \right)^6 \right) \right] \quad (5)$$

in absence of morphogen gradient variability and cell size variability (see supplementary Materials and Methods for further details, Fig. S1). For  $r=2.45 \mu\text{m}$  and  $\lambda=19.3 \mu\text{m}$ , as found for SHH in the mouse neural tube (Cohen et al., 2015), the shift is  $\Delta x=0.039 \mu\text{m}$  or 0.8% of the cell diameter.

In the case of rectangular rather than circular cell areas, cells are confined to the interval  $[x_0-r, x_0+r]$ . The theoretically predicted shift is then approximately  $0.052 \mu\text{m}$  in the mouse neural tube (see supplementary Materials and Methods for further details, Fig. S2) or 1% of the cell diameter. This agrees with the shift we measured in our simulations,  $\Delta x=0.0523\pm 0.0001 \mu\text{m}$  (mean $\pm$ s.e.m.), confirming that spatial averaging of an exponential gradient results in a higher average concentration than centroid readout. Kinetic and area variability both increase  $\Delta x$  (Fig. 3B), but it remains small enough (small fractions of a cell diameter) to be neglected in the analysis of tissue patterning under biological conditions where  $r/\lambda \ll 1$ . Linear gradients (Wolpert, 1969) would not result in any shift at all.

**Spatial averaging barely reduces variability between gradients**

Spatial and temporal averaging can reduce the positional error of morphogen gradients (Berg and Purcell, 1977). Previously, these

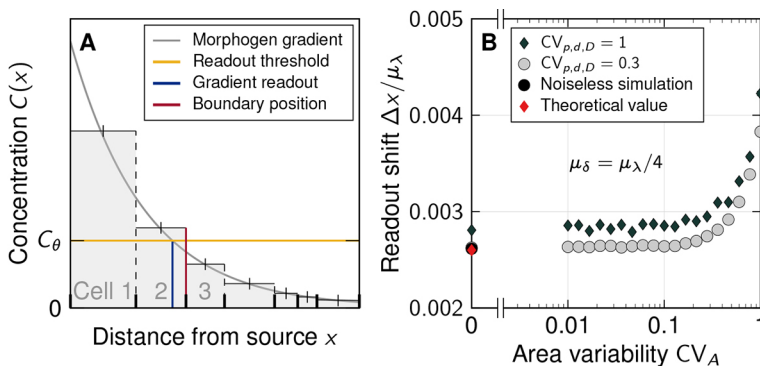

**Fig. 3. Readout position of exponential gradients is barely shifted by spatial averaging.** (A) Cell-based readout of a morphogen gradient. A concentration threshold  $C_\theta$  (yellow) defines a readout position  $x_\theta$  (blue). If cells read out cell area averaged concentrations, the effectively sensed concentration profile is a step function (grey). Pattern boundaries form at cell edges (red). For illustrative purposes, the cell size is exaggerated compared with the gradient decay length. (B) Cell-area-averaged readout of exponential gradients results in a small shift,  $\Delta x$ , compared with readout at the cell centroid.

mechanisms have been mainly analysed at the level of the morphogen readouts – typically transcription factors (TFs) – which are averaged by diffusion between nuclei (Houchmandzadeh et al., 2002; Bialek and Setayeshgar, 2005; Gregor et al., 2007; Erdmann et al., 2009; Sokolowski and Tkačik, 2015; Ellison et al., 2016; Mugler et al., 2016). This is easily possible in a syncytium, as present in the early *Drosophila* embryo, but the role of TF diffusion in increasing patterning precision has remained controversial (Jaeger and Verd, 2020). In an epithelium, nuclei are separated by cell membranes such that the averaging of morphogen-induced factors would require transport between cells, a complex and slow process with many additional sources of molecular noise (Entchev and González-Gaitán, 2002; Lander et al., 2002). However, epithelial cells potentially can reap the benefits of spatial averaging by averaging the morphogen signal over their surface (Fig. 4A, green). Receptors may either be dispersed on the apical cell surface or along the baso-lateral surface, or, in the case of hormones, be limited to nuclei (Saitoh et al., 2013; Zhang et al., 2019). In the last case, morphogen receptors would be limited to a small patch, which could either be randomly positioned (Fig. 4A, blue) or located at the centroid of the cell (Fig. 4A, red). In the mouse neural tube, the SHH receptor PTCH1 is restricted to a cilium located on the apical surface (Saade et al., 2013). The range of spatial averaging then depends on the cilium length and flexibility, rather than the cross-sectional cell area (Fig. 4A, purple). We sought to analyse how the different spatial averaging strategies without crosstalk between neighbouring cells affect the variability of gradients and thus the positional error.

Although the mean cell diameter  $\mu_\delta$  greatly affects the concentration variability  $CV_C$ , the readout strategy has only a moderate impact (Fig. 4B). The difference is most pronounced for large cells ( $\mu_\delta = \mu_\lambda$ ),

where the sensed morphogen variability is largest if the cellular readout point is randomly placed (Fig. 4B, blue). Readout at the centroid or averaged over the entire cell yield similar sensed concentration variabilities. This is understandable because the theoretical considerations above predict only a small shift. In addition, a cilium that averages the gradient concentration over larger regions than a single cell area barely reduces the sensed variability (Fig. 4C).

In summary, larger cross-sectional cell diameters increase the variability of the morphogen concentration profiles, while spatial averaging over the cell surface barely reduces the gradient variability. Spatial averaging may, however, counteract detection noise at low morphogen concentrations far away from the source. It is currently unknown over what distance morphogen gradients operate. At a distance  $12\lambda$  from the source, for example, exponential concentrations will have declined by  $e^{12} \approx 160$ -thousand-fold. At such low levels, detection noise may dominate readout variability unless removed by spatial averaging.

### Scaling of the positional error with gradient length, source size, cell diameter and readout position

From dimensional analysis, the positional error of the gradient,  $\sigma_x$ , being a measure of distance, must scale with a multiplicative combination of the length scales occurring in the patterning process. These can either originate from geometrical features of the tissue or from the reaction-diffusion kinetics. We varied all relevant length scales in simulations and found that  $\sigma_x$  is asymptotically proportional to the mean characteristic gradient decay length,  $\mu_\lambda$ , close to the source, but transitions to  $\mu_\lambda^2$  at larger distances (Fig. 4D). Additionally, it is inversely proportional to the source length  $L_s$ , asymptotically for small  $L_s$  (Fig. 4E), but saturates for large sources.

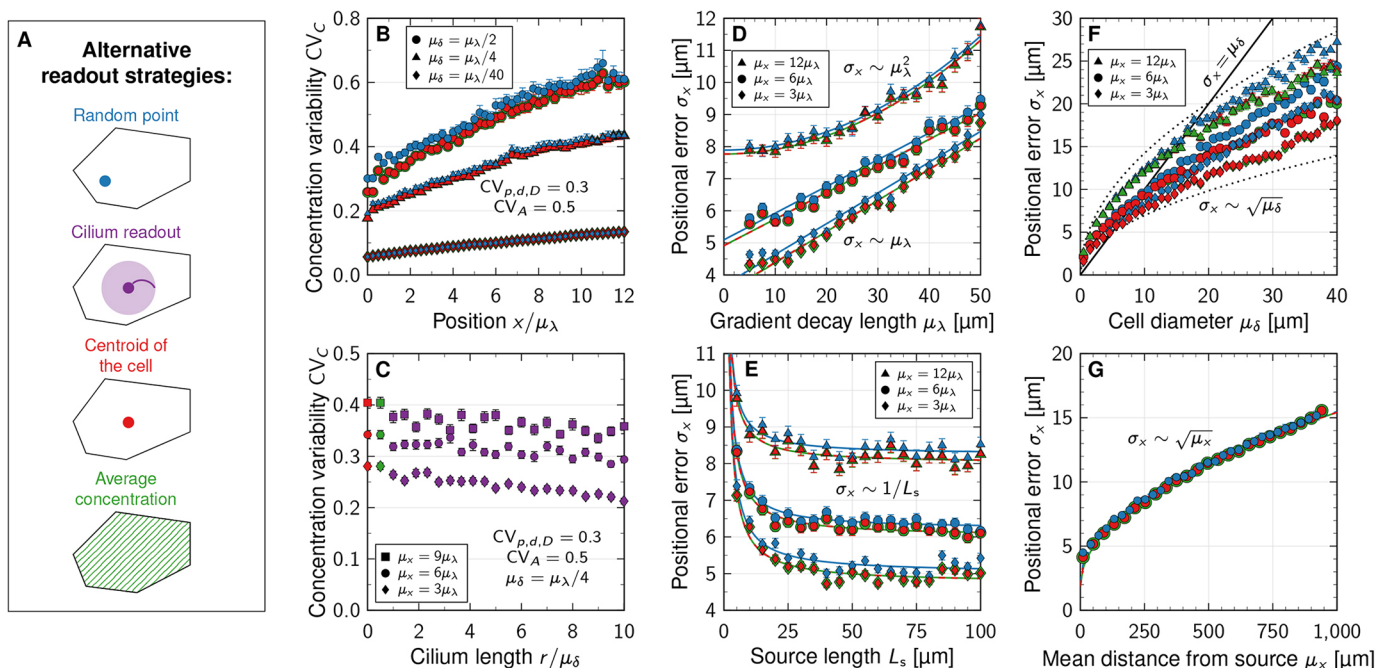

**Fig. 4. Impact of spatial averaging, gradient length, source size, cell diameter and readout position on the positional error of morphogen gradients.** (A) Four different methods to explain how cells may read out morphogens. Colours in B-G correspond to these readout mechanisms. (B) Concentration variability along the patterning domain for different readout mechanisms and different cell sizes. (C) Effect of spatial averaging over a readout region with radius  $r$  on sensed morphogen concentration variability. (D) Impact of absolute gradient decay length  $\mu_\lambda$  on the positional error. (E) Impact of source size  $L_s$  on the positional error. (F) Effect of mean cell diameter  $\mu_\delta$  on the positional error. Dotted lines show the relationship  $\sigma_x = \gamma\sqrt{\mu_\delta}$  for  $\gamma=2.2, 4.5$  (lengths in units of  $\mu\text{m}$ ). (G) Scaling of the positional error with the readout position  $\mu_x$ . Scaling relationships in D-G are asymptotic. Each data point in B-G corresponds to the mean  $\pm$  s.e.m. of  $n=10^3$  independent simulations. Simulation parameters:  $L_\delta=65\mu_\delta$ , except in G;  $\mu_i=20\mu\text{m}$ , except in D;  $L_s=5\mu_\delta$ , except in E;  $m\mu_\delta=5\mu\text{m}$ ,  $CV_{p,d,D}=0.3$ ,  $CV_A=0.5$ . See supplementary Materials and Methods for further details and Table S1 for fit parameters.

Moreover, the positional error increases with the square root of the mean cell diameter  $\mu_\delta$  (Fig. 4F) and, up to an offset, with the square root of the mean position along the patterning axis  $\mu_x$  (Fig. 4G). Together, this can be expressed by the asymptotic scaling relationship

$$\sigma_x \sim \frac{\mu_\lambda}{L_s} \sqrt{\mu_\delta \mu_x}. \quad (6)$$

The linear dependency on the gradient length  $\mu_\lambda$  is due to the effect of gradient steepness on the positional error, and outweighs the reduction in gradient amplitude variability (Fig. 2H). It intuitively follows from  $\sigma_x \approx |\partial C/\partial x|^{-1} \sigma_C \approx \mu_\lambda CV_C$ , which is a valid approximation when the average gradient has an exponential shape (Vetter and Iber, 2022). As before (Fig. 2F), at constant  $\mu_\delta$ , a longer source reduces the gradient amplitude variability because noise is buffered by a larger number of source cells (see supplementary Materials and Methods for further details, Fig. S5). Narrower cells (smaller  $\mu_\delta$ ) reduce the positional error of the morphogen gradients according to the law of large numbers,  $\sigma_x \sim \sqrt{\mu_\delta}$ . Cell width in the patterning domain is more influential than in the source, however, and the benefit of reducing cell width in the source alone is limited (see supplementary Materials and Methods for further details, Fig. S6). The deterministic limit ( $CV_C \rightarrow 0$ ,  $\sigma_x \rightarrow 0$ ) is recovered in the continuum limit  $\mu_\delta \rightarrow 0$ . Domain boundaries can thus be defined more accurately at a certain target location  $\mu_x$  within the tissue with narrow cells. Depending on the other lengths, the positional error can easily be less than a cell diameter if the readout position is close enough to the source (Fig. 4F). We note that the previously reported linear scaling  $\sigma_x \sim \mu_x$  (Vetter and Iber, 2022) is valid only for idealized gradients that vary only through noise in  $\lambda$ , but not in their amplitude or from cell to cell. For the noisy more-physiological gradients simulated here, the positional error increases according to  $\sigma_x \sim \sqrt{\mu_x}$  (asymptotically, Fig. 4G) and thus remains lower with increasing distance from the source than previously anticipated. This further challenges previous reports of excessive inaccuracy of the SHH and BMP gradients in the mouse neural tube (Zagorski et al., 2017).

### High precision of scaled patterns by parallel changes in gradient length, source size and cell diameter in the *Drosophila* wing disc

The Decapentaplegic (Dpp) morphogen gradient in the *Drosophila* wing imaginal disc defines the position of several veins in the adult wing (Fig. 5A). Thus, the anterior-most limits of the Dpp source and the Dpp target gene spalt (*sal*) define the positions of the third (L3) and second (L2) longitudinal veins in the anterior compartment, respectively (Sturtevant et al., 1997; Bollenbach et al., 2008; Restrepo et al., 2014; Tripathi and Irvine, 2022), while the fifth longitudinal (L5) wing vein forms at the border between the expression domains of optomotor-blind (*omb*) and brinker (*brk*) in the posterior compartment (Cook et al., 2004). The Dpp readout positions scale with the total length of the uniformly expanding patterning domain, such that the anterior position of the Sal-domain boundary remains roughly at 40–45% of the anterior domain length  $L_a$ , while the posterior Omb domain boundary remains at approximately 50% of the posterior domain length  $L_p$  (Bollenbach et al., 2008; Wartlick et al., 2011; Hamaratoglu et al., 2011; Restrepo et al., 2014). The gradient readout positions scale with the length of the patterning domain, because both the gradient length,  $\lambda$ , and the gradient amplitude,  $C_0$ , increase dynamically with the expanding tissue (Wartlick et al., 2011; Hamaratoglu et al., 2011; Fried and Iber, 2014, 2015) (Fig. 5B). On their own, the increases in  $\mu_\lambda$  and in  $\mu_x$  would lower the precision of the

readout substantially over time (Eq. 6). However, the Dpp source widens in parallel, keeping the  $\mu_\lambda/L_s$  ratio at about 0.69 (Fig. 5B). Moreover, the apical cell diameter  $\mu_\delta$  shrinks threefold close to the source from 4.5 to 1.5  $\mu\text{m}$  (Aegerter-Wilmsen et al., 2012; Corrigan et al., 2007; Escudero et al., 2011; Legoff et al., 2013; Kocik et al., 2019 preprint), which somewhat balances the increase in  $\mu_x$  over time. Plugging these dynamics into our model, the simulations showed that the positional error at  $\mu_x=0.4L_a$  increases from 2.9  $\mu\text{m}$  to 4.3  $\mu\text{m}$  over developmental time (Fig. 5C, orange diamonds). If no compensation were taking place, the positional error would increase to about 6.5  $\mu\text{m}$  in the same time period (Fig. 5C, blue circles).

The relative patterning precision, as quantified by the coefficient of variation  $CV_x = \sigma_x/\mu_x$ , has even been reported to increase during development, as the CV of the distance between the L2 and L3 veins in the adult fly is only half ( $CV_x=0.08$ ) that of the anterior-most Sal domain boundary ( $CV_x=0.16$ ) (Bollenbach et al., 2008). How this increase in precision is achieved has remained elusive. In light of Eqn 6,  $CV_x = \sigma_x/\mu_x \sim 1/\sqrt{\mu_x}$  (Fig. 5D), such that the decreasing  $CV_x$  in adult stages could at least partly be a consequence of the increase in  $\mu_x=0.4L_a$  between the stage when the precision of the Sal domain boundary was measured and the termination of Dpp-dependent patterning. The asymptotic relationship  $\sigma_x \sim \sqrt{\mu_x}$  may thus provide an explanation of how the relative precision of patterning increases during *Drosophila* wing disc development.

### The effect of spatial correlation

Our theoretical considerations and simulations above are based on statistical independence between adjacent cells. To examine the effect of spatial correlations, we performed additional simulations in which this assumption was relaxed. We introduced a maximal degree of spatial correlation between neighbouring cells, given a certain degree of intercellular variability  $CV_k$ , by sorting the kinetic parameters  $p_i$ ,  $d_i$  and  $D_i$  in ascending or descending order along the patterning axis after they had been drawn from their respective probability distributions, and then solved the reaction-diffusion problem (Eqn 2). The square-root increase of the positional error with the mean cell diameter remains intact in the presence of such spatial correlations between cells (see supplementary Materials and Methods for further details, Fig. S3), with a slightly smaller prefactor. Because any physiological level of cell-to-cell correlation that preserves  $CV_k$  will lie somewhere between the uncorrelated and the maximally correlated extremes, the impact of such a form of spatial correlation on patterning precision can be expected to be minimal, and our findings also remain valid in presence of spatial correlations.

An additional form of inter-cellular correlation may occur if nearby cells stem from the same lineage and, as such, may have correlated kinetic properties. In its most extreme form, neighbouring cells may share all their molecular parameters,  $p$ ,  $d$  and  $D$ , effectively becoming one wider joint cell in our model. We can use our results for cell-autonomous noise to predict the dependency of patterning precision on the number of adjacent cells sharing their kinetic properties,  $N$ . As the effective cell diameter simply becomes  $N\mu_\delta$ , the positional error will scale as  $\sigma_x \sim \sqrt{N}$ . In this sense, the mean cell diameter  $\mu_\delta$  in our formulas may be interpreted as an effective spatial distance over which morphogen kinetics are shared, proportional to a spatial correlation length in the tissue, if any.

Cell-specific morphogen production and decay rates, and local variability in morphogen transport rates have not yet been quantified in epithelial tissues. A spatial coupling of molecular noise in dividing cells would require a perfectly symmetric division of cell contents upon cell division and the absence of cell-intrinsic noise. Dpp-containing endosomes are indeed distributed equally upon cell



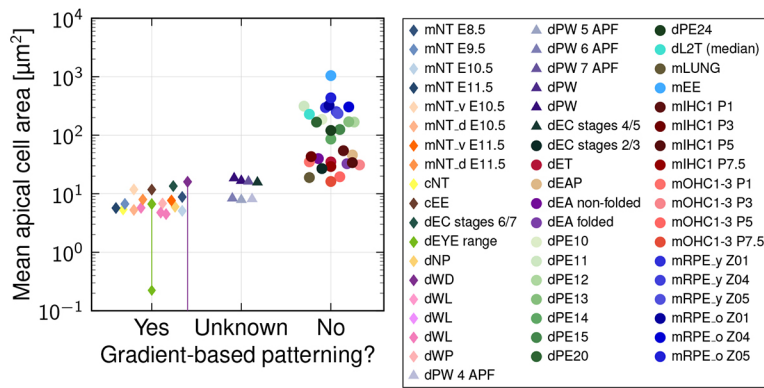

**Fig. 6. Mean apical cell areas of epithelial tissues.** Apical cell areas were categorised into three groups based on whether the tissue is patterned by morphogen gradients or not, or whether this is not known. m, mouse; d, *Drosophila*; c, chick (see text for details).

and remain below  $12 \mu\text{m}^2$  (Escudero et al., 2011; Guerrero et al., 2019; Bocanegra-Moreno et al., 2023). The chick embryonic ectoderm (cEE) appears to be patterned by BMP gradients (Pera et al., 1999), with mean apical cell area just below  $12 \mu\text{m}^2$  (Escudero et al., 2011). In the *Drosophila* larval eye disc (dEYE), notum (dNP) and wing disc (dWL), Hedgehog (Hh), Decapentaplegic (Dpp) and Wg gradients pattern the epithelium (Tomoyasu et al., 2000; Cavodeassi et al., 2002; Briscoe and Small, 2015), with mean apical cell areas smaller than  $7 \mu\text{m}^2$  (Corrigall et al., 2007; Escudero et al., 2011; Aegerter-Wilmsen et al., 2012; Kocic et al., 2019 preprint). The mean apical cell areas of the wing disc increase through the prepupal stages (dWP and dPW), to approximately  $18 \mu\text{m}^2$  in the pupal stages (Escudero et al., 2011; Kocic et al., 2019 preprint); other measurements in the *Drosophila* wing disc (dWD) report mean apical cell areas from 0 to  $16 \mu\text{m}^2$  (Aegerter-Wilmsen et al., 2012). In the *Drosophila* eye antennal disc, no gradient-based patterning was described (dEA folded, mean apical cell areas of approximately  $33 \mu\text{m}^2$ ; dEA non-folded, mean apical cell areas of approximately  $39 \mu\text{m}^2$ ) (Ku and Sun, 2017). For the peripodal membrane (dPE10-24) of the *Drosophila* eye disc, no gradient-based patterning has been described and mean apical cell areas range from  $85 \mu\text{m}^2$  to more than  $300 \mu\text{m}^2$  (Kocic et al., 2019 preprint). In the *Drosophila* egg chamber (dEC), the mean apical cell areas decline from around  $30 \mu\text{m}^2$  at stage 2/3 to around  $10 \mu\text{m}^2$  by stage 6/7 (Finegan et al., 2019), consistent with reported gradient-based patterning at stage 6 (Osterfield et al., 2017); we did not find reports of earlier gradient-based patterning. Although gradients pattern the *Drosophila* blastoderm syncytium (Briscoe and Small, 2015), we are not aware of morphogen gradient readout during cellularisation. In the *Drosophila* embryo anterior pole (dEAP), the mean apical cell area is approximately  $46 \mu\text{m}^2$  and in the embryo trunk (dET) it is roughly  $35 \mu\text{m}^2$  (Rupprecht et al., 2017), much larger than in the neural tube or wing disc. Before cellularisation, the situation is different from that in an epithelium in that free diffusion in the inter-nuclear space of the syncytium likely counteracts any sharp transition in the kinetic parameters, as represented in our epithelial model, where cell membranes compartmentalise space. In the *Drosophila* L2 trachea (dL2 T), no gradients have been reported and the mean apical cell areas are greater than  $200 \mu\text{m}^2$  (Skouloudaki et al., 2019). In the mouse embryonic lung (mLUNG), no morphogen gradients have been reported, despite chemical patterning (Iber, 2021), and the mean apical cell area is approximately  $19 \mu\text{m}^2$  (Kadzic et al., 2014). Mean apical cell areas in the postnatal (P1-P21) cochlea are between 15 and  $55 \mu\text{m}^2$  (Etournay et al., 2010). In adult mouse retinal pigment epithelial (mRPE) cells, the mean apical cell areas exceed  $200 \mu\text{m}^2$  in young mice (P30) and increase to over  $400 \mu\text{m}^2$  in old mice (P720) (Kim et al., 2021). No gradient-based patterning has

been reported in mouse outer hair cells (mOHC1-3; P1, P3, P5, P7.5); mean apical cell areas decrease from  $35 \mu\text{m}^2$  (P1) to  $16 \mu\text{m}^2$  (P7.5). No gradient-based patterning takes place in the inner hair cells (mIHC1; P1, P3, P6, P7.5); mean apical cell areas decrease from  $54 \mu\text{m}^2$  (P1) to  $29 \mu\text{m}^2$  (P7.5) (Etournay et al., 2010). No gradient-based patterning has been reported in the mouse ear epidermis (mEE), with mean apical cell areas of  $1044 \mu\text{m}^2$  (Yokouchi et al., 2016). The data thus confirm that apical cell areas are small in tissues that employ gradient-based patterning. Our theory makes no prediction about the apical areas in tissues that do not employ gradient-based patterning, but in all cases that we have checked, apical areas are larger and appear to further increase in later developmental stages and in adult animals.

## DISCUSSION

We have shown that gradient precision decreases with increasing cross-sectional area of the patterned cells. Consistent with our prediction, apical surface areas are small in epithelia that employ gradient-based patterning. In curved domains, spatial precision will be higher on the inside, where the average cell diameter is smaller. In the mouse neural tube, the SHH-sensing cilium is indeed located on the inner, apical surface (Saade et al., 2013), while in the flat *Drosophila* imaginal discs, cells sense Hedgehog along the entire apical-basal axis (Gore et al., 2021). In the *Drosophila* wing disc, the apical cell diameters shrink in the centre of the domain, such that the apical areas are almost twofold smaller close to the source and increase roughly linearly (Corrigall et al., 2007; Widmann and Dahmann, 2009; Legoff et al., 2013; Bai et al., 2013). In the eye disc, the size gradient is even more pronounced, with tiny apical areas in the Dpp secreting morphogenetic furrow (Corrigall et al., 2007). The declining apical cell diameters have previously been attributed to a mechanical pressure feedback caused by growth (Hufnagel et al., 2007; Aegerter-Wilmsen et al., 2012). However, signalling by Dpp, the fly homolog of mammalian BMP2/4, has been shown to result in taller cells with smaller cross-sectional area in its patterning domain compared with other parts of the *Drosophila* wing and eye disc (Corrigall et al., 2007; Widmann and Dahmann, 2009; Legoff et al., 2013; Bai et al., 2013). Similarly, the morphogens SHH and WNT have been observed to increase cell height and reduce the cell cross-sectional area via their impact on actin polymerisation, myosin localisation and activity in the embryonic mouse neural tube and lung (Kadzic et al., 2014; Widmann and Dahmann, 2009; Gritli-Linde et al., 2002; Kondo and Hayashi, 2015; Chiang et al., 1996). Complementary to these observations, it would be interesting to test our hypothesis in experiments that alter cell shape using either a genetic or mechanical approach (Neufeld et al., 1998; Duda et al., 2019).

In light of our study, it is possible that the morphogen-dependent reduction in the cross-sectional cell area via positive modulation of cell height serves to enhance patterning precision. The precision advantage of small cell diameters may then have led to the emergence of pseudostratification in epithelial monolayers, a phenomenon that has so far remained unexplained. Our finding that wide cells and very large cell area variability are both detrimental to patterning precision indicate that there is potentially a window for epithelial pseudostratification in which patterning precision is optimal: High cell density benefits precision because cell diameters are small; however, with nuclei much wider than the average cell diameter (Gómez et al., 2021), precision would decline due to large area variability. It is remarkable that all the tissues we analysed seem to lie in the optimal range of this trade-off (Kokic et al., 2019 preprint).

We have revealed scaling relationships between the positional error, cell diameter, gradient decay length and source length (Eqn 6). In follow-up work, we found that these also hold for non-exponential gradients arising from non-linear morphogen degradation (Adelmann et al., 2023), as far as they were studied, and also in 2D tissue patterning (Long et al., 2023 preprint). These relationships predict that morphogen gradients remain highly accurate over very long distances, providing precise positional information even at a distance from the morphogen source. Our results are system-agnostic, and could thus apply widely in development. The compensation between cell diameter, gradient length, source size and readout location, which we have found here, allows a patterning system to tune its length scales to achieve a particular level of spatial precision. Our theoretical work suggests a potential evolutionary benefit for a developmental mechanism that regulates features such as the cell diameter or the  $\lambda/L_s$  ratio to maintain high patterning precision. A loss in precision due to a shift in readout position away from the morphogen source, for example, can be compensated for by narrower cells in the source or in the patterning domain. This allows developmental systems to maintain high patterning precision at readout positions that scale with a growing tissue domain.

Whether pre-steady-state gradients, as likely play a role in the patterning of the *Drosophila* wing disc (Fried and Iber, 2014), follow the same behaviour as discovered here for the steady state, remains an issue for future research. Assuming that they do, our results offer a potential explanation for the observed increase in relative patterning precision during wing disc development.

## MATERIALS AND METHODS

### Generation of variable morphogen gradients

The patterning axis was constructed as follows: a random cell area  $A_i$  was drawn for cell  $i=1$ , and then converted to a diameter  $\delta_i = 2\sqrt{A_i/\pi}$ , which assumes that cell surfaces are roughly isotropic. This process was repeated for the next cells  $i=2, 3, \dots$  until their cumulated diameters matched the domain length  $L_s$  or  $L_p$ . To control the mean cell diameter  $\mu_\delta$ , cell areas were drawn with a mean value of  $\mu_A = \pi(\mu_\delta/2)^2(1 + CV_A^2)^{1/4}$  for given  $\mu_\delta$  and  $CV_A$ , as follows from the transformation properties of log-normal random variables, such that  $\mu_\delta = E[\delta_i] = 2E[\sqrt{A_i}]/\sqrt{\pi}$ . The patterning axis was then discretized into subintervals of length  $\delta_i$ ; the source and patterning domains were pasted together, such that  $x=0$  marked the source boundary; random kinetic parameters  $p_i$ ,  $d_i$  and  $D_i$  were drawn independently for each cell from log-normal distributions. The results reported in this work are largely independent of the specific choice of probability distribution, given that they do not allow for very small (or even negative) kinetic parameters, which would not be compatible with a successful morphogen transport and patterning process. A gamma distribution with the same mean and variance, for example, yields largely unchanged behaviour (see supplementary Materials and Methods for further details, Fig. S4).

We then solved Eqn 2 numerically on the discretized domain using Matlab's built-in fourth-order boundary value problem solver `bvp4c` (version R2020b). Continuity of the morphogen concentration and its flux was imposed at each cell boundary. Further technical details can be found in Vetter and Iber (2022). Each simulation was repeated  $n=10^3$  times with independent random parameters and cell areas.

### Gradient parameter extraction

We determined the amplitude  $C_0$  and decay length  $\lambda$  for each numerically generated noisy morphogen gradient by fitting the deterministic solution to it. With no-flux boundaries, the gradient shapes are hyperbolic cosines that slightly deviate from a pure exponential at the far end (Vetter and Iber, 2022). We fitted these inside the patterning domain to obtain  $C_0$  and  $\lambda$  after logarithmisation of the morphogen concentration, as detailed by Vetter and Iber (2022).

As the fitted characteristic gradient length  $\lambda$  drifts away from the prescribed value for noisy gradients depending on which of the kinetic parameters is varied and by how much (Vetter and Iber, 2022), we corrected for this drift in our numerical implementation to be able to use the true observed value of  $\mu_\lambda$  in our results:

$$\begin{aligned}\mu_\lambda &= \lambda(1 + 0.435CV_d^2)^{-0.080} \\ \mu_\lambda &= \lambda(1 - 0.003CV_D + 1.045CV_D^2 - 0.113CV_D^3 \\ &\quad + 0.0043CV_D^4)^{0.471}, \\ \mu_\lambda &= \lambda(1 - 0.011CV_{p,d,D} + 1.355CV_{p,d,D}^2 - 0.179CV_{p,d,D}^3 \\ &\quad + 0.0077CV_{p,d,D}^4)^{0.357}\end{aligned}$$

where  $\lambda$  is the deterministic (prescribed) value. When only the production rate  $p$  was varied,  $\mu_\lambda = \lambda$ . These empirical relationships approximate the data shown by Vetter and Iber (2022).

### Acknowledgements

We thank Marco Meer for providing cell area data, and Fernando Casares and Nikolaos Doumpas for discussions.

### Competing interests

The authors declare no competing or financial interests.

### Author contributions

Conceptualization: R.V., D.I.; Methodology: R.V.; Software: J.A.A., R.V.; Formal analysis: R.V.; Investigation: J.A.A., R.V., D.I.; Data curation: D.I.; Writing - original draft: J.A.A., R.V., D.I.; Writing - review & editing: J.A.A., R.V., D.I.; Visualization: R.V.; Supervision: R.V., D.I.; Project administration: D.I.; Funding acquisition: D.I.

### Funding

This work was funded by a Schweizerischer Nationalfonds zur Förderung der Wissenschaftlichen Forschung Sinergia grant (CRSII5\_170930). Open Access funding provided by ETH Zurich: Eidgenössische Technische Hochschule Zurich. Deposited in PMC for immediate release.

### Data availability

This study did not produce new data. The source code is released under the 3-clause BSD license and is deposited in GitLab (<https://git.bsse.ethz.ch/iber/Publications/2022>).

### Peer review history

The peer review history is available online at <https://journals.biologists.com/dev/lookup/doi/10.1242/dev.201702.reviewer-comments.pdf>

### References

- Adelmann, J. A., Vetter, R. and Iber, D. (2023). Patterning precision under non-linear morphogen decay and molecular noise. *Elife* **12**, e84757. doi:10.7554/eLife.84757
- Aegerter-Wilmsen, T., Heimlicher, M. B., Smith, A. C., De Reuille, P. B., Smith, R. S., Aegerter, C. M. and Basler, K. (2012). Integrating force-sensing and signaling pathways in a model for the regulation of wing imaginal disc size. *Development* **139**, 3221-3231. doi:10.1242/dev.082800



- Akieda, Y., Ogami, S., Furuie, H., Ishitani, S., Akiyoshi, R., Nogami, J., Masuda, T., Shimizu, N., Ohkawa, Y. and Ishitani, T. (2019). Cell competition corrects noisy Wnt morphogen gradients to achieve robust patterning in the zebrafish embryo. *Nat. Commun.* **10**, 4710. doi:10.1038/s41467-019-12609-4
- Bai, L., Widmann, T., Jülicher, F., Dahmann, C. and Breen, D. (2013). 3D surface reconstruction and visualization of the *Drosophila* wing imaginal disc at cellular resolution. *Proc. SPIE*. **8654**, 86540D. doi:10.1117/12.2008497
- Berg, H. C. and Purcell, E. M. (1977). Physics of chemoreception. *Biophys. J.* **20**, 193-219. doi:10.1016/S0006-3495(77)85544-6
- Bialek, W. and Setayeshgar, S. (2005). Physical limits to biochemical signaling. *Proc. Natl. Acad. Sci. USA* **102**, 10040-10045. doi:10.1073/pnas.0504321102
- Bocanegra-Moreno, L., Singh, A., Hannezo, E., Zagorski, M. and Kicheva, A. (2023). Cell cycle dynamics controls fluidity of the developing mouse neuroepithelium. *Nat. Phys.* doi:10.1038/s41567-023-01977-w
- Bökel, C., Schwabedissen, A., Entchev, E., Renaud, O. and González-Gaitán, M. (2006). Sara endosomes and the maintenance of Dpp signaling levels across mitosis. *Science* **314**, 1135-1139. doi:10.1126/science.1132524
- Bollenbach, T., Pantazis, P., Kicheva, A., Bökel, C., González-Gaitán, M. and Jülicher, F. (2008). Precision of the Dpp gradient. *Development* **135**, 1137-1146. doi:10.1242/dev.012062
- Briscoe, J. and Small, S. (2015). Morphogen rules: design principles of gradient-mediated embryo patterning. *Development* **142**, 3996-4009. doi:10.1242/dev.129452
- Cavodeassi, F., Rodríguez, I. and Modolell, J. (2002). Dpp signalling is a key effector of the wing-body wall subdivision of the *Drosophila* mesothorax. *Development* **129**, 3815-3823. doi:10.1242/dev.129.16.3815
- Chiang, C., Litingtung, Y., Lee, E., Young, K. E., Corden, J. L., Westphal, H. and Beachy, P. A. (1996). Cyclopia and defective axial patterning in mice lacking *Sonic hedgehog* gene function. *Nature* **383**, 407-413. doi:10.1038/383407a0
- Cohen, M., Kicheva, A., Ribeiro, A., Blassberg, R., Page, K. M., Barnes, C. P. and Briscoe, J. (2015). Ptch1 and Gli regulate Shh signalling dynamics via multiple mechanisms. *Nat. Commun.* **6**, 6709. doi:10.1038/ncomms7709
- Cook, O., Biehs, B. and Bier, E. (2004). *brinker* and *optomotor-blind* act coordinately to initiate development of the L5 wing vein primordium in *Drosophila*. *Development* **131**, 2113-2124. doi:10.1242/dev.01100
- Corrigall, D., Walther, R. F., Rodriguez, L., Fichelson, P. and Pichaud, F. (2007). Hedgehog signaling is a principal inducer of Myosin-II-driven cell ingression in *Drosophila* epithelia. *Dev. Cell* **13**, 730-742. doi:10.1016/j.devcel.2007.09.015
- Duda, M., Kirkland, N. J., Khalilgharibi, N., Tozluoglu, M., Yuen, A. C., Carpi, N., Bove, A., Piel, M., Charras, G., Baum, B. et al. (2019). Polarization of myosin II refines tissue material properties to buffer mechanical stress. *Dev. Cell* **48**, 245-260.e7. doi:10.1016/j.devcel.2018.12.020
- Ellison, D., Mugler, A., Brennan, M. D., Lee, S. H., Huebner, R. J., Shamir, E. R., Woo, L. A., Kim, J., Amar, P., Nemenman, I. et al. (2016). Cell-cell communication enhances the capacity of cell ensembles to sense shallow gradients during morphogenesis. *Proc. Natl. Acad. Sci. USA* **113**, E679-E688. doi:10.1073/pnas.1516503113
- Elowitz, M. B., Levine, A. J., Siggia, E. D. and Swain, P. S. (2002). Stochastic gene expression in a single cell. *Science* **297**, 1183-1186. doi:10.1126/science.1070919
- Entchev, E. V. and González-Gaitán, M. A. (2002). Morphogen gradient formation and vesicular trafficking. *Traffic* **3**, 98-109. doi:10.1034/j.1600-0854.2002.030203.x
- Erdmann, T., Howard, M. and Ten Wolde, P. R. (2009). Role of spatial averaging in the precision of gene expression patterns. *Phys. Rev. Lett.* **103**, 258101. doi:10.1103/PhysRevLett.103.258101
- Escudero, L. M., Costa, L. D. F., Kicheva, A., Briscoe, J., Freeman, M. and Babu, M. M. (2011). Epithelial organisation revealed by a network of cellular contacts. *Nat. Commun.* **2**, 526. doi:10.1038/ncomms1536
- Etournay, R., Lepelletier, L., Boutet De Monvel, J., Michel, V., Cayet, N., Leibovici, M., Weil, D., Foucher, I., Hardelin, J. P. and Petit, C. (2010). Cochlear outer hair cells undergo an apical circumference remodeling constrained by the hair bundle shape. *Development* **137**, 1373-1383. doi:10.1242/dev.045138
- Finegan, T. M., Na, D., Cammarota, C., Skeeters, A. V., Nadasi, T. J., Dawney, N. S., Fletcher, A. G., Oakes, P. W. and Bergstralh, D. T. (2019). Tissue tension and not interphase cell shape determines cell division orientation in the *Drosophila* follicular epithelium. *EMBO J.* **38**, e100072. doi:10.15252/embj.2018100072
- Fried, P. and Iber, D. (2014). Dynamic scaling of morphogen gradients on growing domains. *Nat. Commun.* **5**, 5077. doi:10.1038/ncomms6077
- Fried, P. and Iber, D. (2015). Read-out of dynamic morphogen gradients on growing domains. *PLoS One* **10**, e0143226. doi:10.1371/journal.pone.0143226
- Gómez, H. F., Dumond, M. S., Hodél, L., Vetter, R. and Iber, D. (2021). 3D cell neighbourhood dynamics in growing pseudostratified epithelia. *Elife* **10**, e68135. doi:10.7554/eLife.68135
- Gore, T., Matussek, T., D'Angelo, G., Giordano, C., Tognacci, T., Lavenant-Staccini, L., Rabouille, C. and Théron, P. P. (2021). The GTPase Rab8 differentially controls the long- and short-range activity of the Hedgehog morphogen gradient by regulating Hedgehog apico-basal distribution. *Development* **148**, dev191791. doi:10.1242/dev.191791
- Gregor, T., Mcgregor, A. P. and Wieschaus, E. F. (2008). Shape and function of the Bicoid morphogen gradient in dipteran species with different sized embryos. *Dev. Biol.* **316**, 350-358. doi:10.1016/j.ydbio.2008.01.039
- Gregor, T., Tank, D. W., Wieschaus, E. F. and Bialek, W. (2007). Probing the limits to positional information. *Cell* **130**, 153-164. doi:10.1016/j.cell.2007.05.025
- Gritti-Linde, A., Bei, M., Maas, R., Zhang, X. M., Linde, A. and McMahon, A. P. (2002). Shh signaling within the dental epithelium is necessary for cell proliferation, growth and polarization. *Development* **129**, 5323-5337. doi:10.1242/dev.00100
- Guerrero, P., Perez-Carrasco, R., Zagorski, M., Page, D., Kicheva, A., Briscoe, J. and Page, K. M. (2019). Neuronal differentiation influences progenitor arrangement in the vertebrate neuroepithelium. *Development* **146**, dev176297. doi:10.1242/dev.176297
- Hamaratoglu, F., De Lachapelle, A. M., Pyrowolakis, G., Bergmann, S. and Affolter, M. (2011). Dpp signaling activity requires pentagone to scale with tissue size in the growing *Drosophila* wing imaginal disc. *PLoS Biol.* **9**, e1001182. doi:10.1371/journal.pbio.1001182
- Houchmandzadeh, B., Wieschaus, E. and Leibler, S. (2002). Establishment of developmental precision and proportions in the early *Drosophila* embryo. *Nature* **415**, 798-802. doi:10.1038/415798a
- Hufnagel, L., Teleman, A. A., Rouault, H., Cohen, S. M. and Shraiman, B. I. (2007). On the mechanism of wing size determination in fly development. *Proc. Natl. Acad. Sci. USA* **104**, 3835-3840. doi:10.1073/pnas.0607134104
- Iber, D. (2021). The control of lung branching morphogenesis. *Curr. Top. Dev. Biol.* **143**, 205-237.
- Imuta, Y., Koyama, H., Shi, D., Eiraku, M., Fujimori, T. and Sasaki, H. (2014). Mechanical control of notochord morphogenesis by extra-embryonic tissues in mouse embryos. *Mech. Dev.* **132**, 44-58. doi:10.1016/j.mod.2014.01.004
- Jaeger, J. and Verd, B. (2020). Dynamic positional information: patterning mechanism versus precision in gradient-driven systems. *Curr. Top. Dev. Biol.* **137**, 219-246. doi:10.1016/bs.ctdb.2019.11.017
- Kadzik, R. S., Cohen, E. D., Morley, M. P., Stewart, K. M., Lu, M. M. and Morrisey, E. E. (2014). Wnt ligand/Frizzled 2 receptor signaling regulates tube shape and branch-point formation in the lung through control of epithelial cell shape. *Proc. Natl. Acad. Sci. USA* **111**, 12444-12449. doi:10.1073/pnas.1406639111
- Kicheva, A., Pantazis, P., Bollenbach, T., Kalaidzidis, Y., Bittig, T., Jülicher, F. and González-Gaitán, M. (2007). Kinetics of morphogen gradient formation. *Science* **315**, 521-525. doi:10.1126/science.1135774
- Kicheva, A., Bollenbach, T., Ribeiro, A., Valle, H. P., Lovell-Badge, R., Episkopou, V. and Briscoe, J. (2014). Coordination of progenitor specification and growth in mouse and chick spinal cord. *Science* **345**, 1254927. doi:10.1126/science.1254927
- Kim, Y. K., Yu, H., Summers, V. R., Donaldson, K. J., Ferdous, S., Shelton, D., Zhang, N., Chrenek, M. A., Jiang, Y., Grossniklaus, H. E. et al. (2021). Morphometric analysis of retinal pigment epithelial cells from C57BL/6J mice during aging. *Invest. Ophthalmol. Vis. Sci.* **62**, 32. doi:10.1167/iov.62.2.32
- Kokic, M., Iannini, A., Villa-Fombuena, G., Casares, F. and Iber, D. (2019). Minimisation of surface energy drives apical epithelial organisation and gives rise to Lewis' law. *BioRxiv* doi:10.1101/590729
- Kondo, T. and Hayashi, S. (2015). Mechanisms of cell height changes that mediate epithelial invagination. *Dev. Growth Differ.* **57**, 313-323. doi:10.1111/dgd.12224
- Ku, H.-Y. and Sun, Y. H. (2017). Notch-dependent epithelial fold determines boundary formation between developmental fields in the *Drosophila* antenna. *PLoS Genet.* **13**, e1006898. doi:10.1371/journal.pgen.1006898
- Lander, A. D., Nie, Q. and Wan, F. Y. M. (2002). Do Morphogen gradients arise by diffusion? *Dev. Cell* **2**, 785-796. doi:10.1016/s1534-5807(02)00179-x
- Lander, A. D., Lo, W.-C., Nie, Q. and Wan, F. Y. M. (2009). The measure of success: constraints, objectives, and tradeoffs in Morphogen-mediated patterning. *CSH Perspect. Biol.* **1**, a002022. doi:10.1101/cshperspect.a002022
- Legoff, L., Rouault, H. and Lecuit, T. (2013). A global pattern of mechanical stress polarizes cell divisions and cell shape in the growing *Drosophila* wing disc. *Development* **140**, 4051-4059. doi:10.1242/dev.090878
- Long, Y., Vetter, R. and Iber, D. (2023). 2d effects enhance precision of gradient-based tissue patterning. *BioRxiv* doi:10.1101/2023.03.13.532369
- Mateus, R., Holtzer, L., Seum, C., Hadjivasilou, Z., Dubois, M., Jülicher, F. and Gonzalez-Gaitán, M. (2020). BMP signaling gradient scaling in the zebrafish pectoral fin. *Cell Rep.* **30**, 4292-4302.e7. doi:10.1016/j.celrep.2020.03.024
- Matsuda, S., Schaefer, J. V., Mii, Y., Hori, Y., Bieli, D., Taira, M., Plücker, A. and Affolter, M. (2021). Asymmetric requirement of Dpp/BMP morphogen dispersal in the *Drosophila* wing disc. *Nat. Commun.* **12**, 6435. doi:10.1038/s41467-021-26726-6
- Morishita, Y. and Iwasa, Y. (2009). Accuracy of positional information provided by multiple morphogen gradients with correlated noise. *Phys. Rev. E* **79**, 061905. doi:10.1103/PhysRevE.79.061905
- Morishita, Y. and Iwasa, Y. (2011). Coding design of positional information for robust morphogenesis. *Biophys. J.* **101**, 2324-2335. doi:10.1016/j.bpj.2011.09.048
- Mugler, A., Levchenko, A. and Nemenman, I. (2016). Limits to the precision of gradient sensing with spatial communication and temporal integration. *Proc. Natl. Acad. Sci. USA* **113**, E689-E695. doi:10.1073/pnas.1509597112

- Neufeld, T. P., De La Cruz, A. F. A., Johnston, L. A. and Edgar, B. A. (1998). Coordination of growth and cell division in the *Drosophila* wing. *Cell* **93**, 1183-1193. doi:10.1016/S0092-8674(00)81462-2
- Osterfield, M., Berg, C. A. and Shvartsman, S. Y. (2017). Epithelial patterning, morphogenesis, and evolution: *Drosophila* eggshell as a model. *Dev. Cell* **41**, 337-348. doi:10.1016/j.devcel.2017.02.018
- Pera, E., Stein, S. and Kessel, M. (1999). Ectodermal patterning in the avian embryo: epidermis versus neural plate. *Development* **126**, 63-73. doi:10.1242/dev.126.1.63
- Raser, J. M. and O'Shea, E. K. (2005). Noise in gene expression: origins, consequences, and control. *Science* **309**, 2010-2013. doi:10.1126/science.1105891
- Restrepo, S., Zartman, J. J. and Basler, K. (2014). Coordination of patterning and growth by the morphogen dpp. *Curr. Biol.* **24**, R245-R255. doi:10.1016/j.cub.2014.01.055
- Reyes, R., Lander, A. and Nahmad, M. (2022). Dynamic readout of the Hh gradient in the drosophila wing disc reveals pattern-specific tradeoffs between robustness and precision. *BioRxiv*. doi:10.1101/2022.12.21.521489
- Rupprecht, J. F., Ong, K. H., Yin, J., Huang, A., Dinh, H. H., Singh, A. P., Zhang, S., Yu, W. and Saunders, T. E. (2017). Geometric constraints alter cell arrangements within curved epithelial tissues. *Mol. Biol. Cell* **28**, 3582-3594. doi:10.1091/mbc.e17-01-0060
- Saade, M., Gutierrez-Vallejo, I., Le Dreau, G., Rabadan, M. A., Miguez, D. G., Buceta, J. and Marti, E. (2013). Sonic Hedgehog signaling switches the mode of division in the developing nervous system. *Cell Rep.* **4**, 492-503. doi:10.1016/j.celrep.2013.06.038
- Saitoh, M., Shirakihara, T., Fukasawa, A., Horiguchi, K., Sakamoto, K., Sugiya, H., Beppu, H., Fujita, Y., Morita, I., Miyazono, K. et al. (2013). Basolateral BMP signaling in polarized epithelial cells. *PLoS One* **8**, e62659. doi:10.1371/journal.pone.0062659
- Sánchez-Gutiérrez, D., Tozluoglu, M., Barry, J. D., Pascual, A., Mao, Y. and Escudero, L. M. (2016). Fundamental physical cellular constraints drive self-organization of tissues. *EMBO J.* **35**, 77-88. doi:10.15252/embj.201592374
- Skouloudaki, K., Papadopoulos, D. K., Tomancak, P. and Knust, E. (2019). The apical protein Apnoia interacts with Crumbs to regulate tracheal growth and inflation. *PLoS Genet.* **15**, e1007852. doi:10.1371/journal.pgen.1007852
- Sokolowski, T. R. and Tkačik, G. (2015). Optimizing information flow in small genetic networks. iv. spatial coupling. *Phys. Rev. E* **91**, 062710. doi:10.1103/PhysRevE.91.062710
- Sturtevant, M. A., Biehls, B., Marin, E. and Bier, E. (1997). The spalt gene links the A/P compartment boundary to a linear adult structure in the *Drosophila* wing. *Development* **124**, 21-32. doi:10.1242/dev.124.1.21
- Tkačik, G., Dubuis, J. O., Petkova, M. D. and Gregor, T. (2015). Positional information, positional error, and readout precision in morphogenesis: a mathematical framework. *Genetics* **199**, 39-59. doi:10.1534/genetics.114.171850
- Tomoyasu, Y., Ueno, N. and Nakamura, M. (2000). The Decapentaplegic morphogen gradient regulates the notal *wingless* expression through induction of *pannier* and *u-shaped* in *Drosophila*. *Mech. Dev.* **96**, 37-49. doi:10.1016/S0925-4773(00)00374-9
- Tripathi, B. K. and Irvine, K. D. (2022). The wing imaginal disc. *Genetics* **220**, iyac020. doi:10.1093/genetics/iyac020
- Tsai, T. Y.-C., Sikora, M., Xia, P., Colak-Champollion, T., Knaut, H., Heisenberg, C.-P. and Megason, S. G. (2020). An adhesion code ensures robust pattern formation during tissue morphogenesis. *Science* **370**, 113-116. doi:10.1126/science.aba6637
- Urban, E. A. and Johnston, R. J. (2018). Buffering and amplifying transcriptional noise during cell fate specification. *Front. Genet.* **9**, 591. doi:10.3389/fgene.2018.00591
- Vetter, R. and Iber, D. (2022). Precision of morphogen gradients in neural tube development. *Nat. Commun.* **13**, 1145. doi:10.1038/s41467-022-28834-3
- Wartlick, O., Mumcu, P., Kicheva, A., Bittig, T., Seum, C., Jülicher, F. and González-Gaitán, M. (2011). Dynamics of Dpp signaling and proliferation control. *Science* **331**, 1154-1159. doi:10.1126/science.1200037
- Wartlick, O., Jülicher, F. and González-Gaitán, M. (2014). Growth control by a moving morphogen gradient during *Drosophila* eye development. *Development* **141**, 1884-1893. doi:10.1242/dev.105650
- Widmann, T. J. and Dahmann, C. (2009). Dpp signaling promotes the cuboidal-to-columnar shape transition of *Drosophila* wing disc epithelia by regulating Rho1. *J. Cell Sci.* **122**, 1362-1373. doi:10.1242/jcs.044271
- Wolpert, L. (1969). Positional information and the spatial pattern of cellular differentiation. *J. Theor. Biol.* **25**, 1-47. doi:10.1016/S0022-5193(69)80016-0
- Xiong, F., Tentner, A. R., Huang, P., Gelas, A., Mosaliganti, K. R., Souhait, L., Rannou, N., Swinburne, I. A., Obholzer, N. D., Cowgill, P. D. et al. (2013). Specified neural progenitors sort to form sharp domains after noisy shh signaling. *Cell* **153**, 550-561. doi:10.1016/j.cell.2013.03.023
- Yokouchi, M., Atsugi, T., Van Logtestijn, M., Tanaka, R. J., Kajimura, M., Suematsu, M., Furuse, M., Amagai, M. and Kubo, A. (2016). Epidermal cell turnover across tight junctions based on Kelvin's tetrakaidecahedron cell shape. *Elife* **5**, e19593. doi:10.7554/eLife.19593
- Yu, S. R., Burkhardt, M., Nowak, M., Ries, J., Petrasek, Z., Scholpp, S., Schwill, P. and Brand, M. (2009). Fgf8 morphogen gradient forms by a source-sink mechanism with freely diffusing molecules. *Nature* **461**, 533-536. doi:10.1038/nature08391
- Zagorski, M., Tabata, Y., Brandenberg, N., Lutolf, M. P., Tkacik, G., Bollenbach, T., Briscoe, J. and Kicheva, A. (2017). Decoding of position in the developing neural tube from antiparallel morphogen gradients. *Science* **356**, 1379-1383. doi:10.1126/science.aam5887
- Zhang, Z., Zwick, S., Loew, E., Grimley, J. S. and Ramanathan, S. (2019). Mouse embryo geometry drives formation of robust signaling gradients through receptor localization. *Nat. Commun.* **10**, 4516. doi:10.1038/s41467-019-12533-7
- Zoller, B., Nicolas, D., Molina, N. and Naef, F. (2015). Structure of silent transcription intervals and noise characteristics of mammalian genes. *Mol. Syst. Biol.* **11**, 823. doi:10.15252/msb.20156257
